# Supplementary material for: MicroRNA-enriched small extracellular vesicles possess odonto-immunomodulatory properties for modulating the immune response of macrophages and promoting odontogenesis
Source: PubMed Central journal article supplement (PMC7708107; doi:10.1186/s13287-020-02039-1), 2020-11-30
Supplement: 13287_2020_2039_MOESM2_ESM.pdf [file 13287_2020_2039_MOESM2_ESM.pdf]

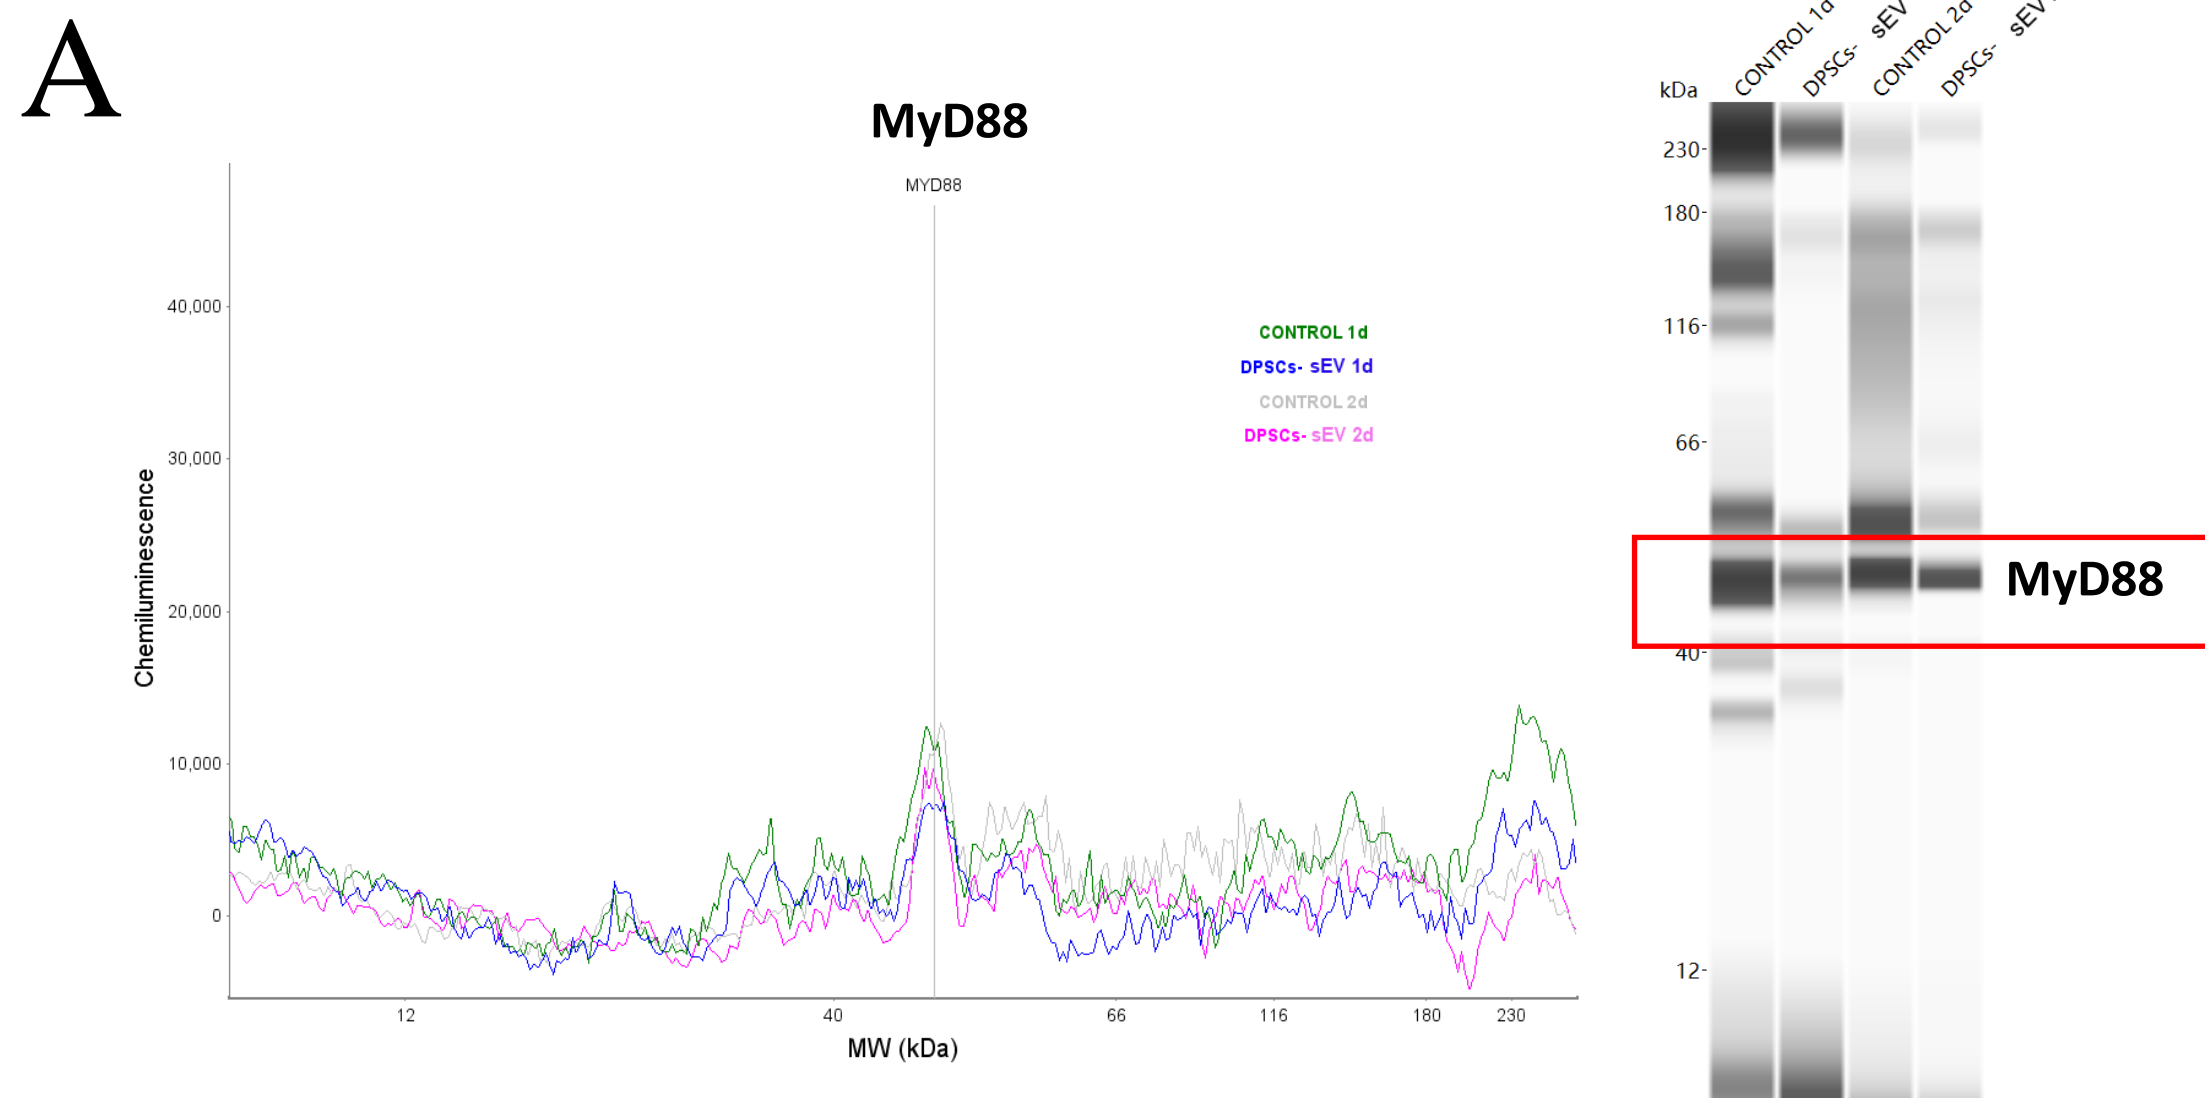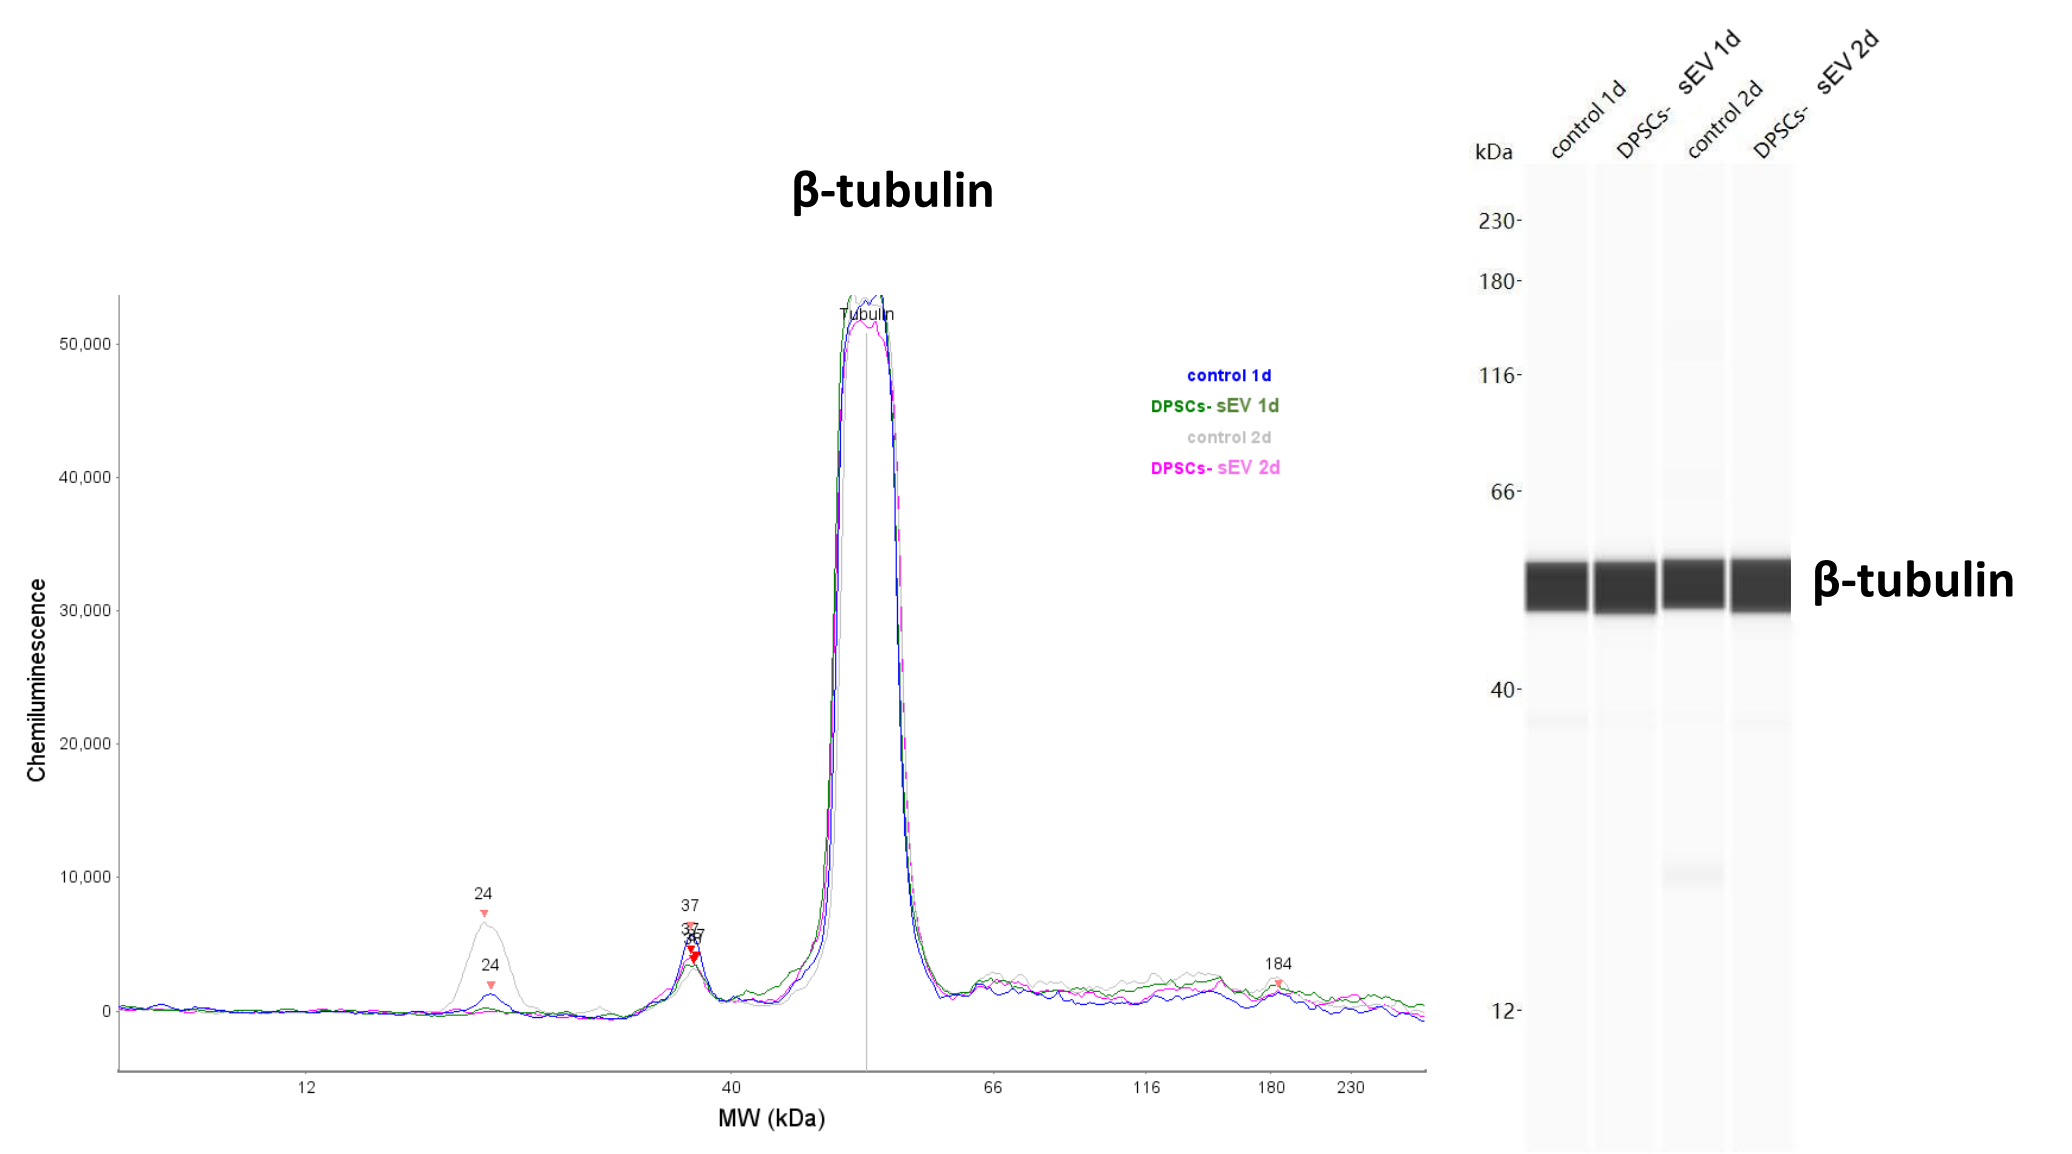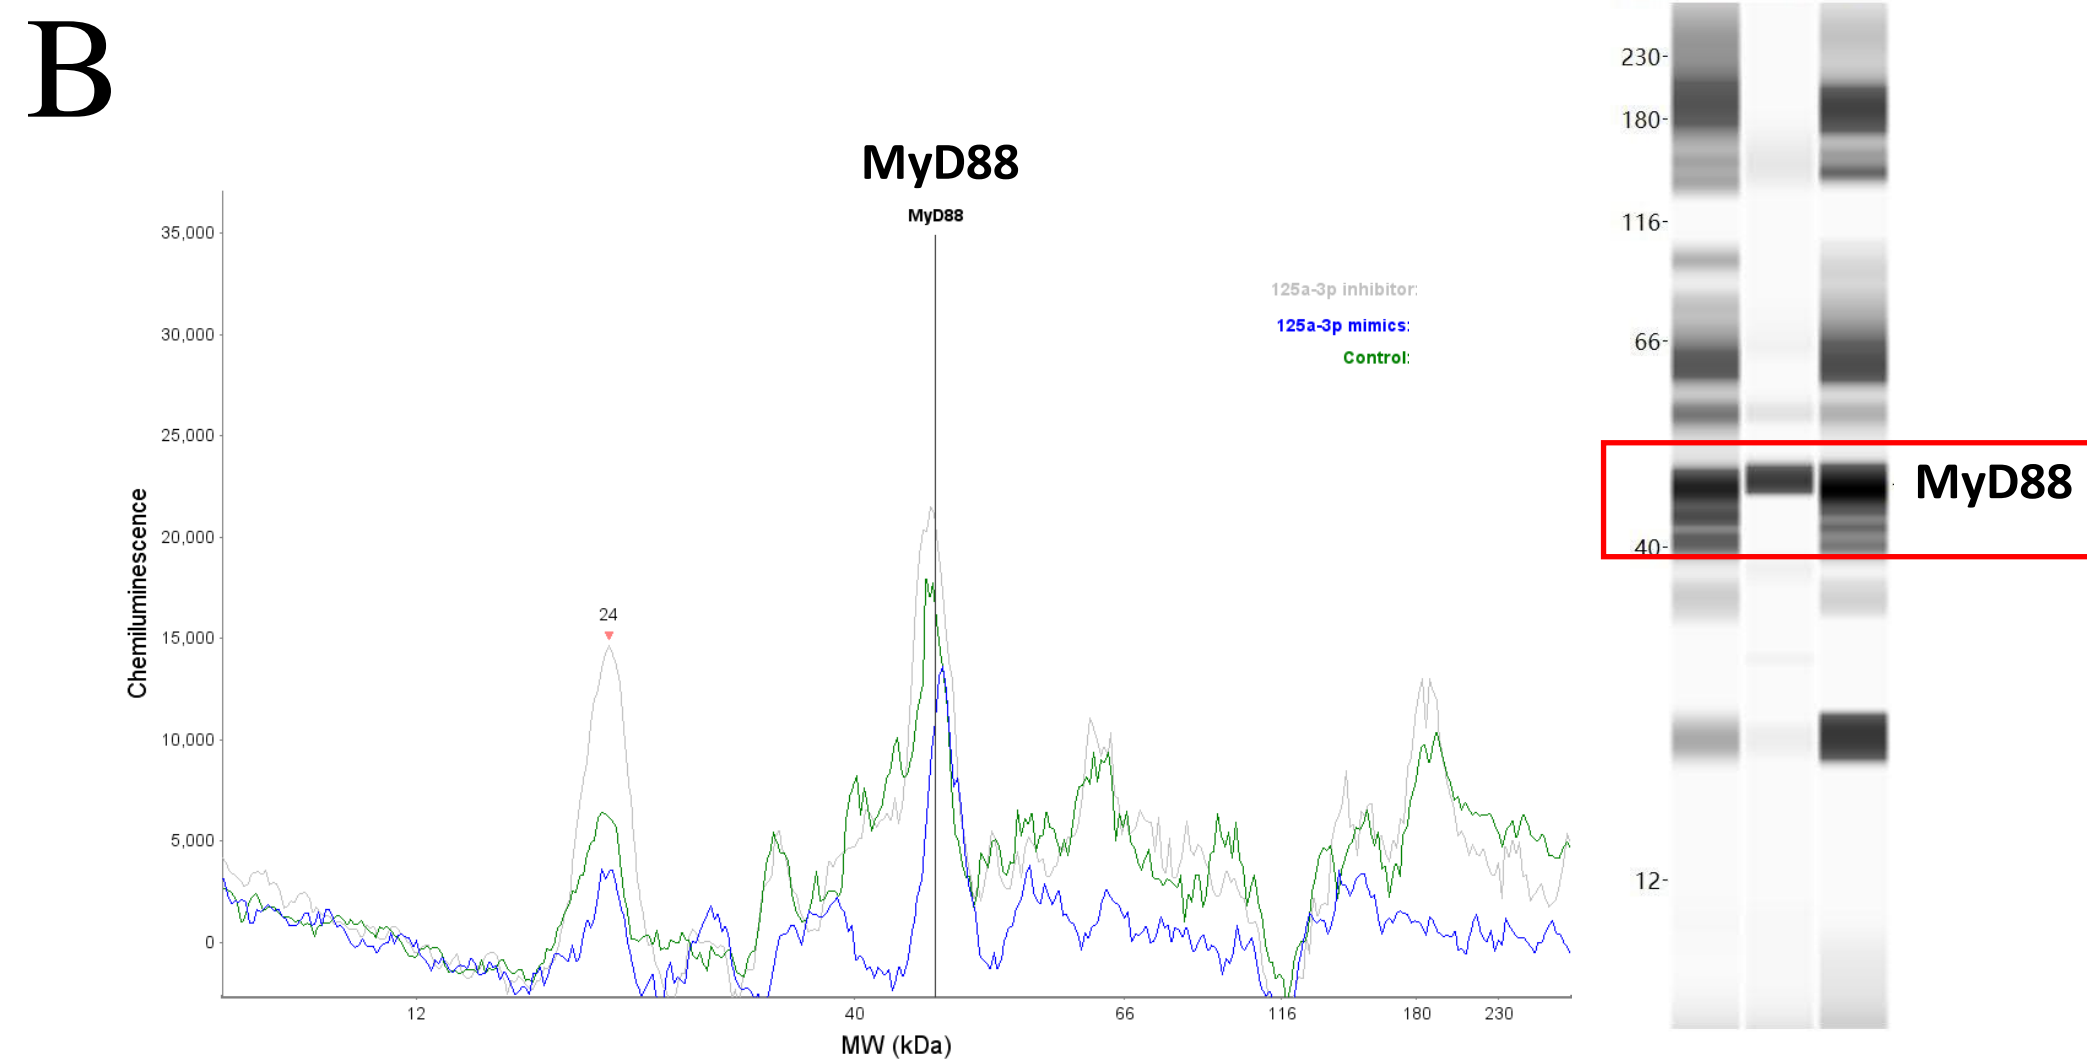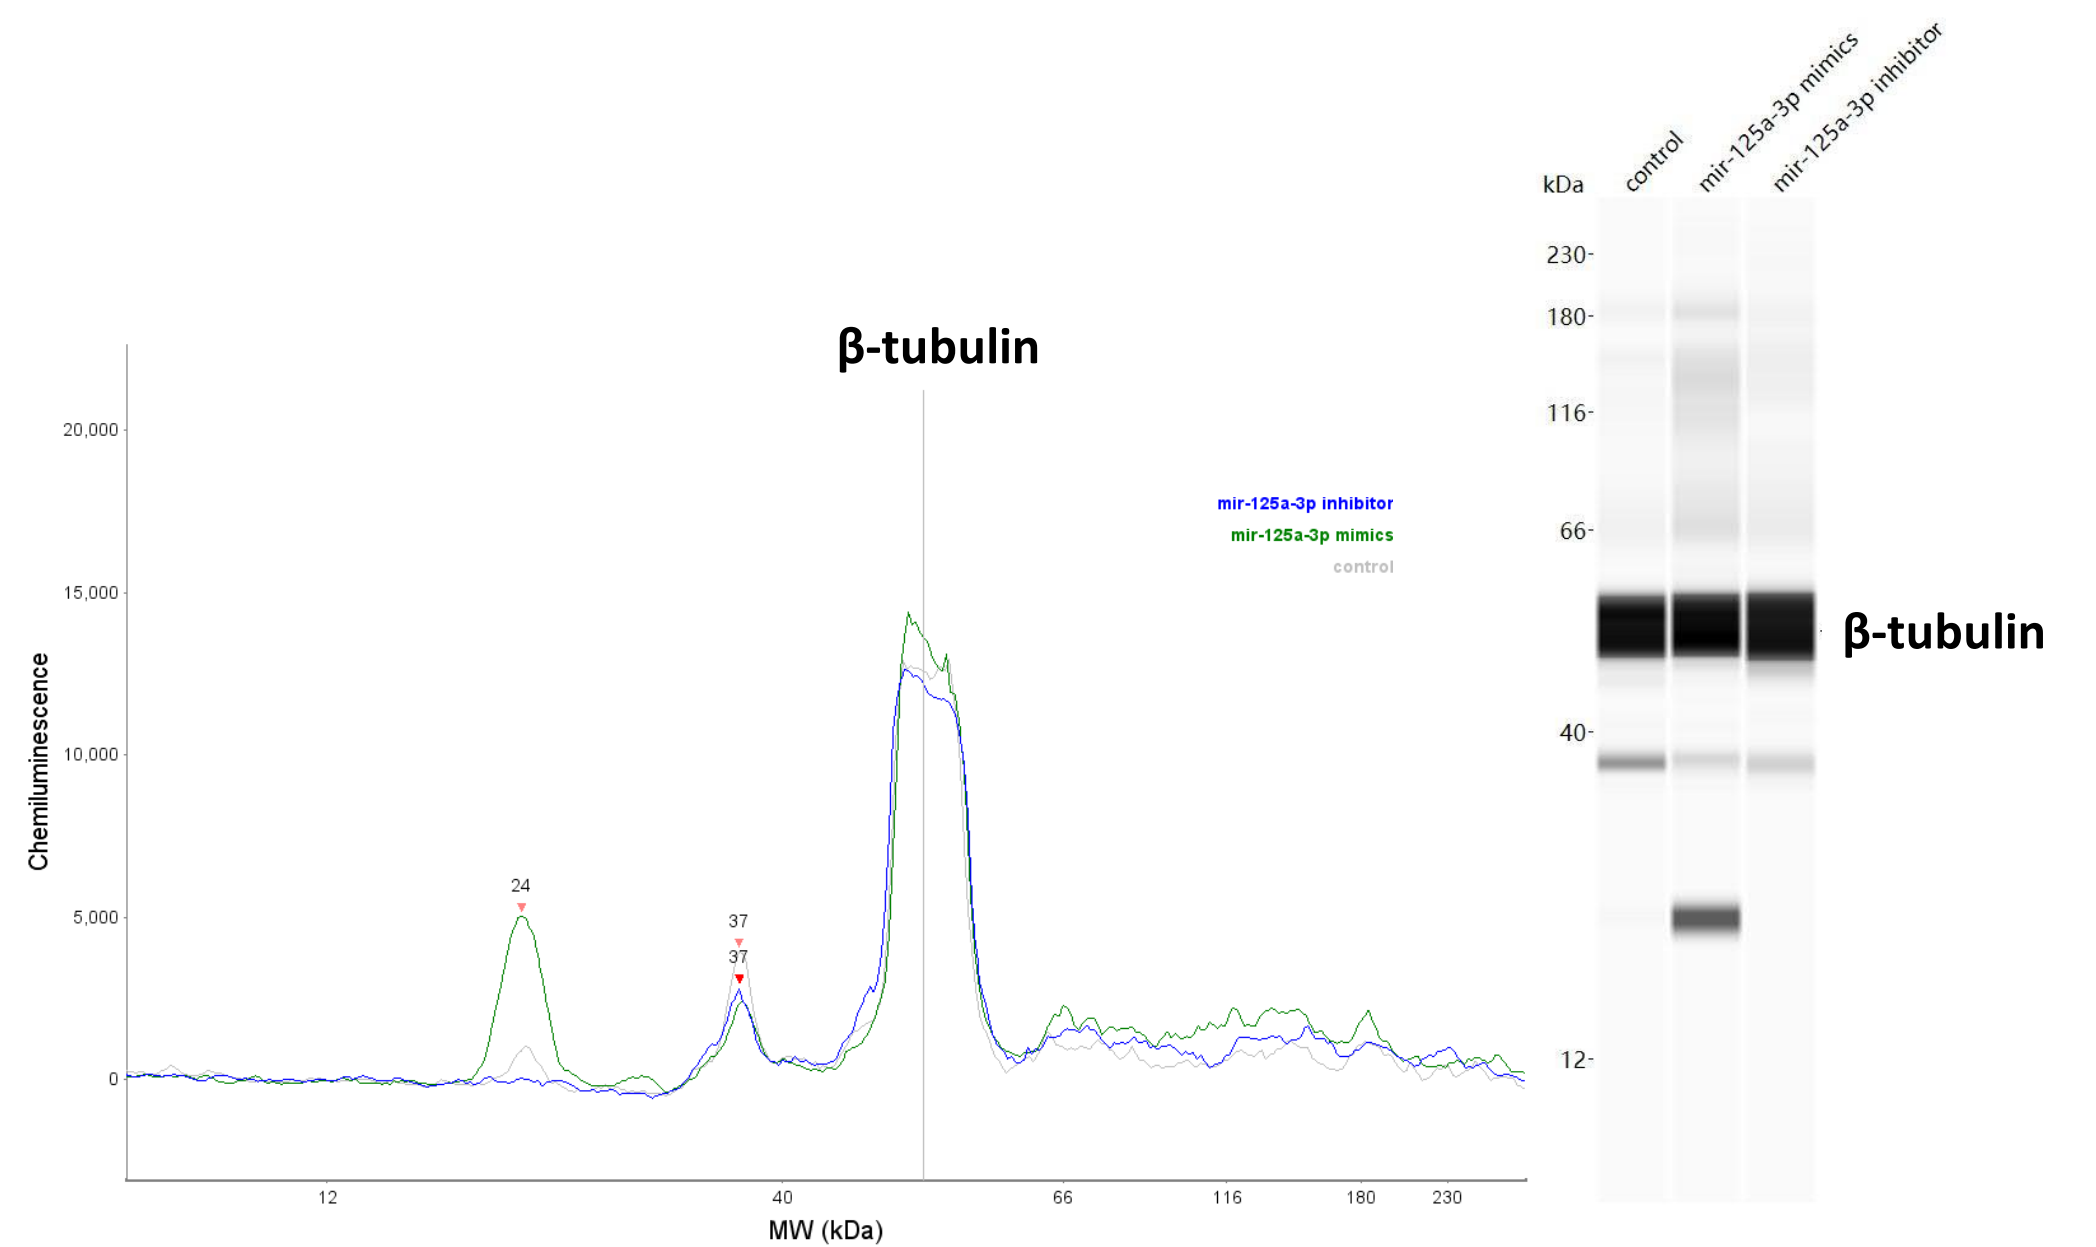

**Figure S2. Original non-edited images of Chemiluminescence intensity and the automatically generated bands for MyD88 and  $\beta$ -tubulin. (A) DPSCs-sEV down-regulated the expression of MyD88 in macrophages. (B) miR-125a-3p down-regulated the expression of MyD88 in macrophages.**
