# Supplementary material for: MicroRNA-enriched small extracellular vesicles possess odonto-immunomodulatory properties for modulating the immune response of macrophages and promoting odontogenesis
Source: PubMed Central journal article supplement (PMC7708107; doi:10.1186/s13287-020-02039-1), 2020-11-30

**A**

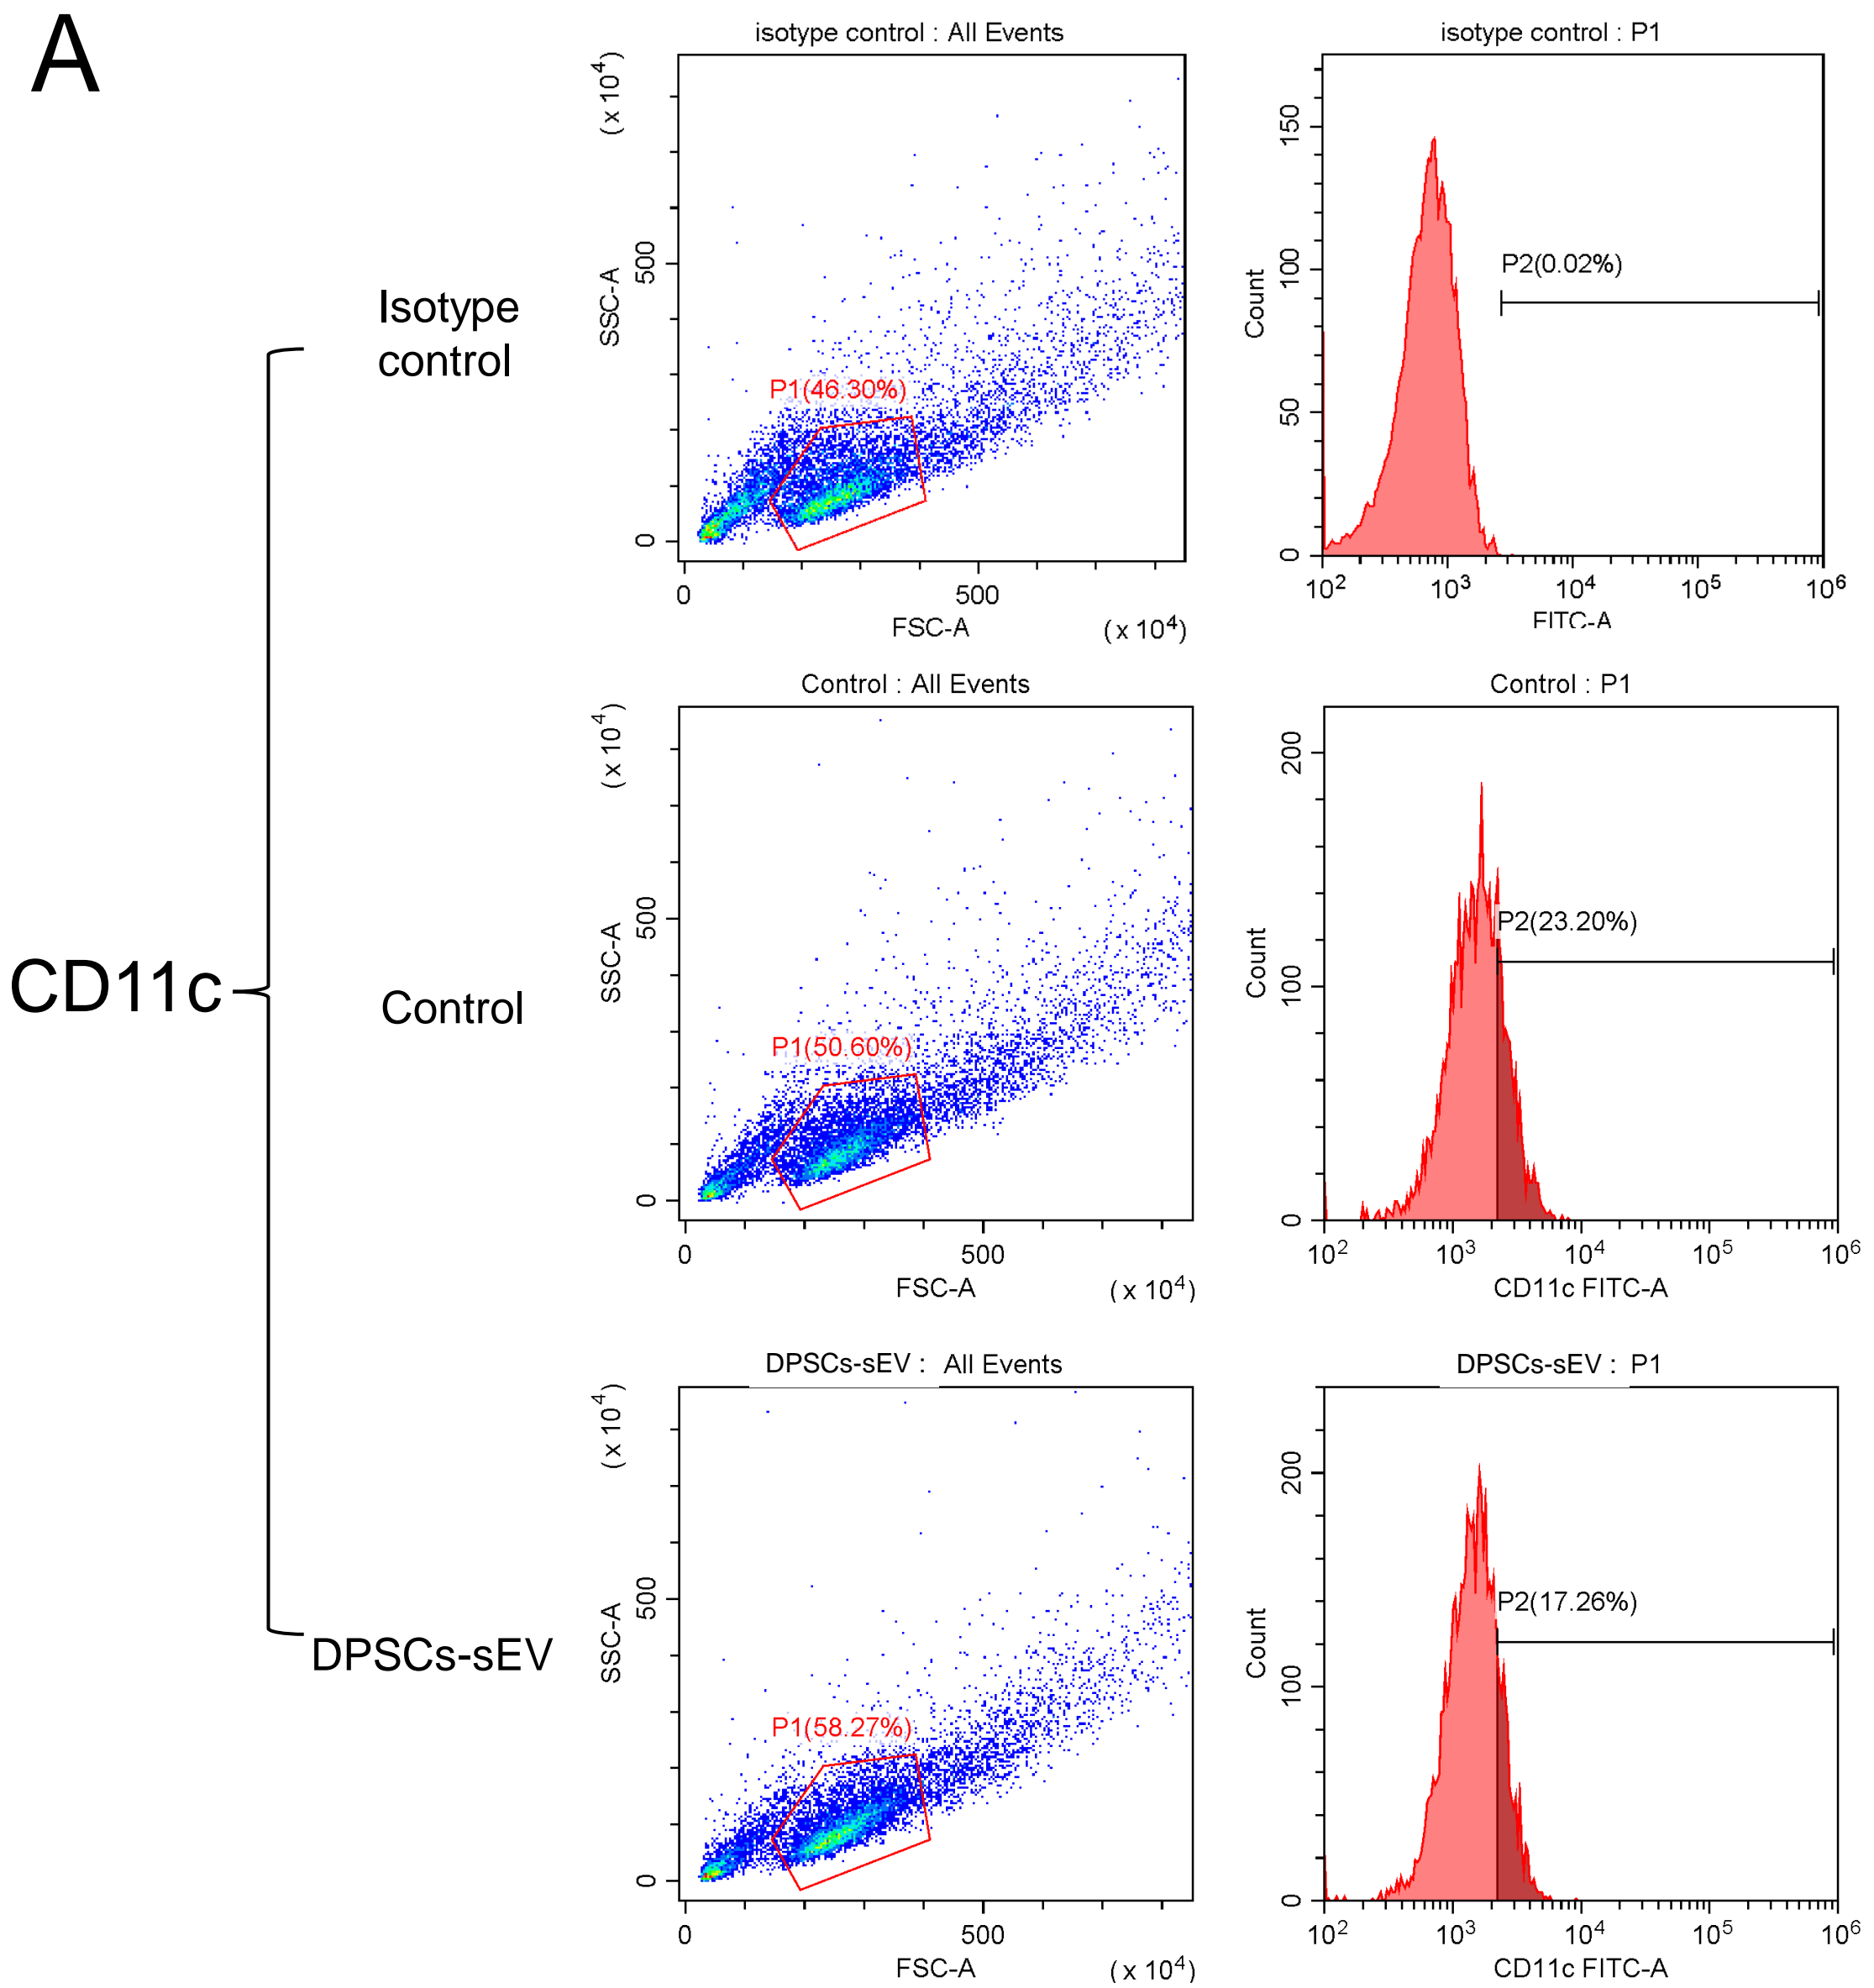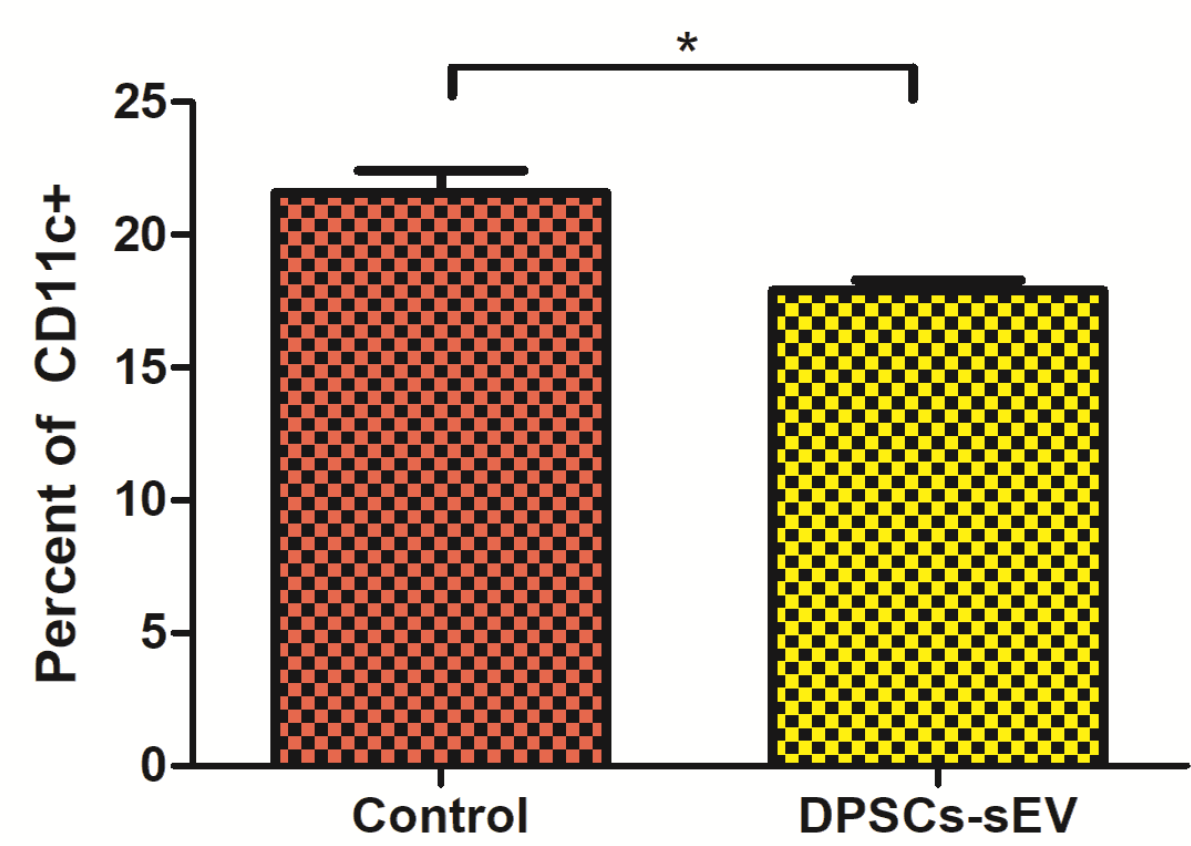

**B**

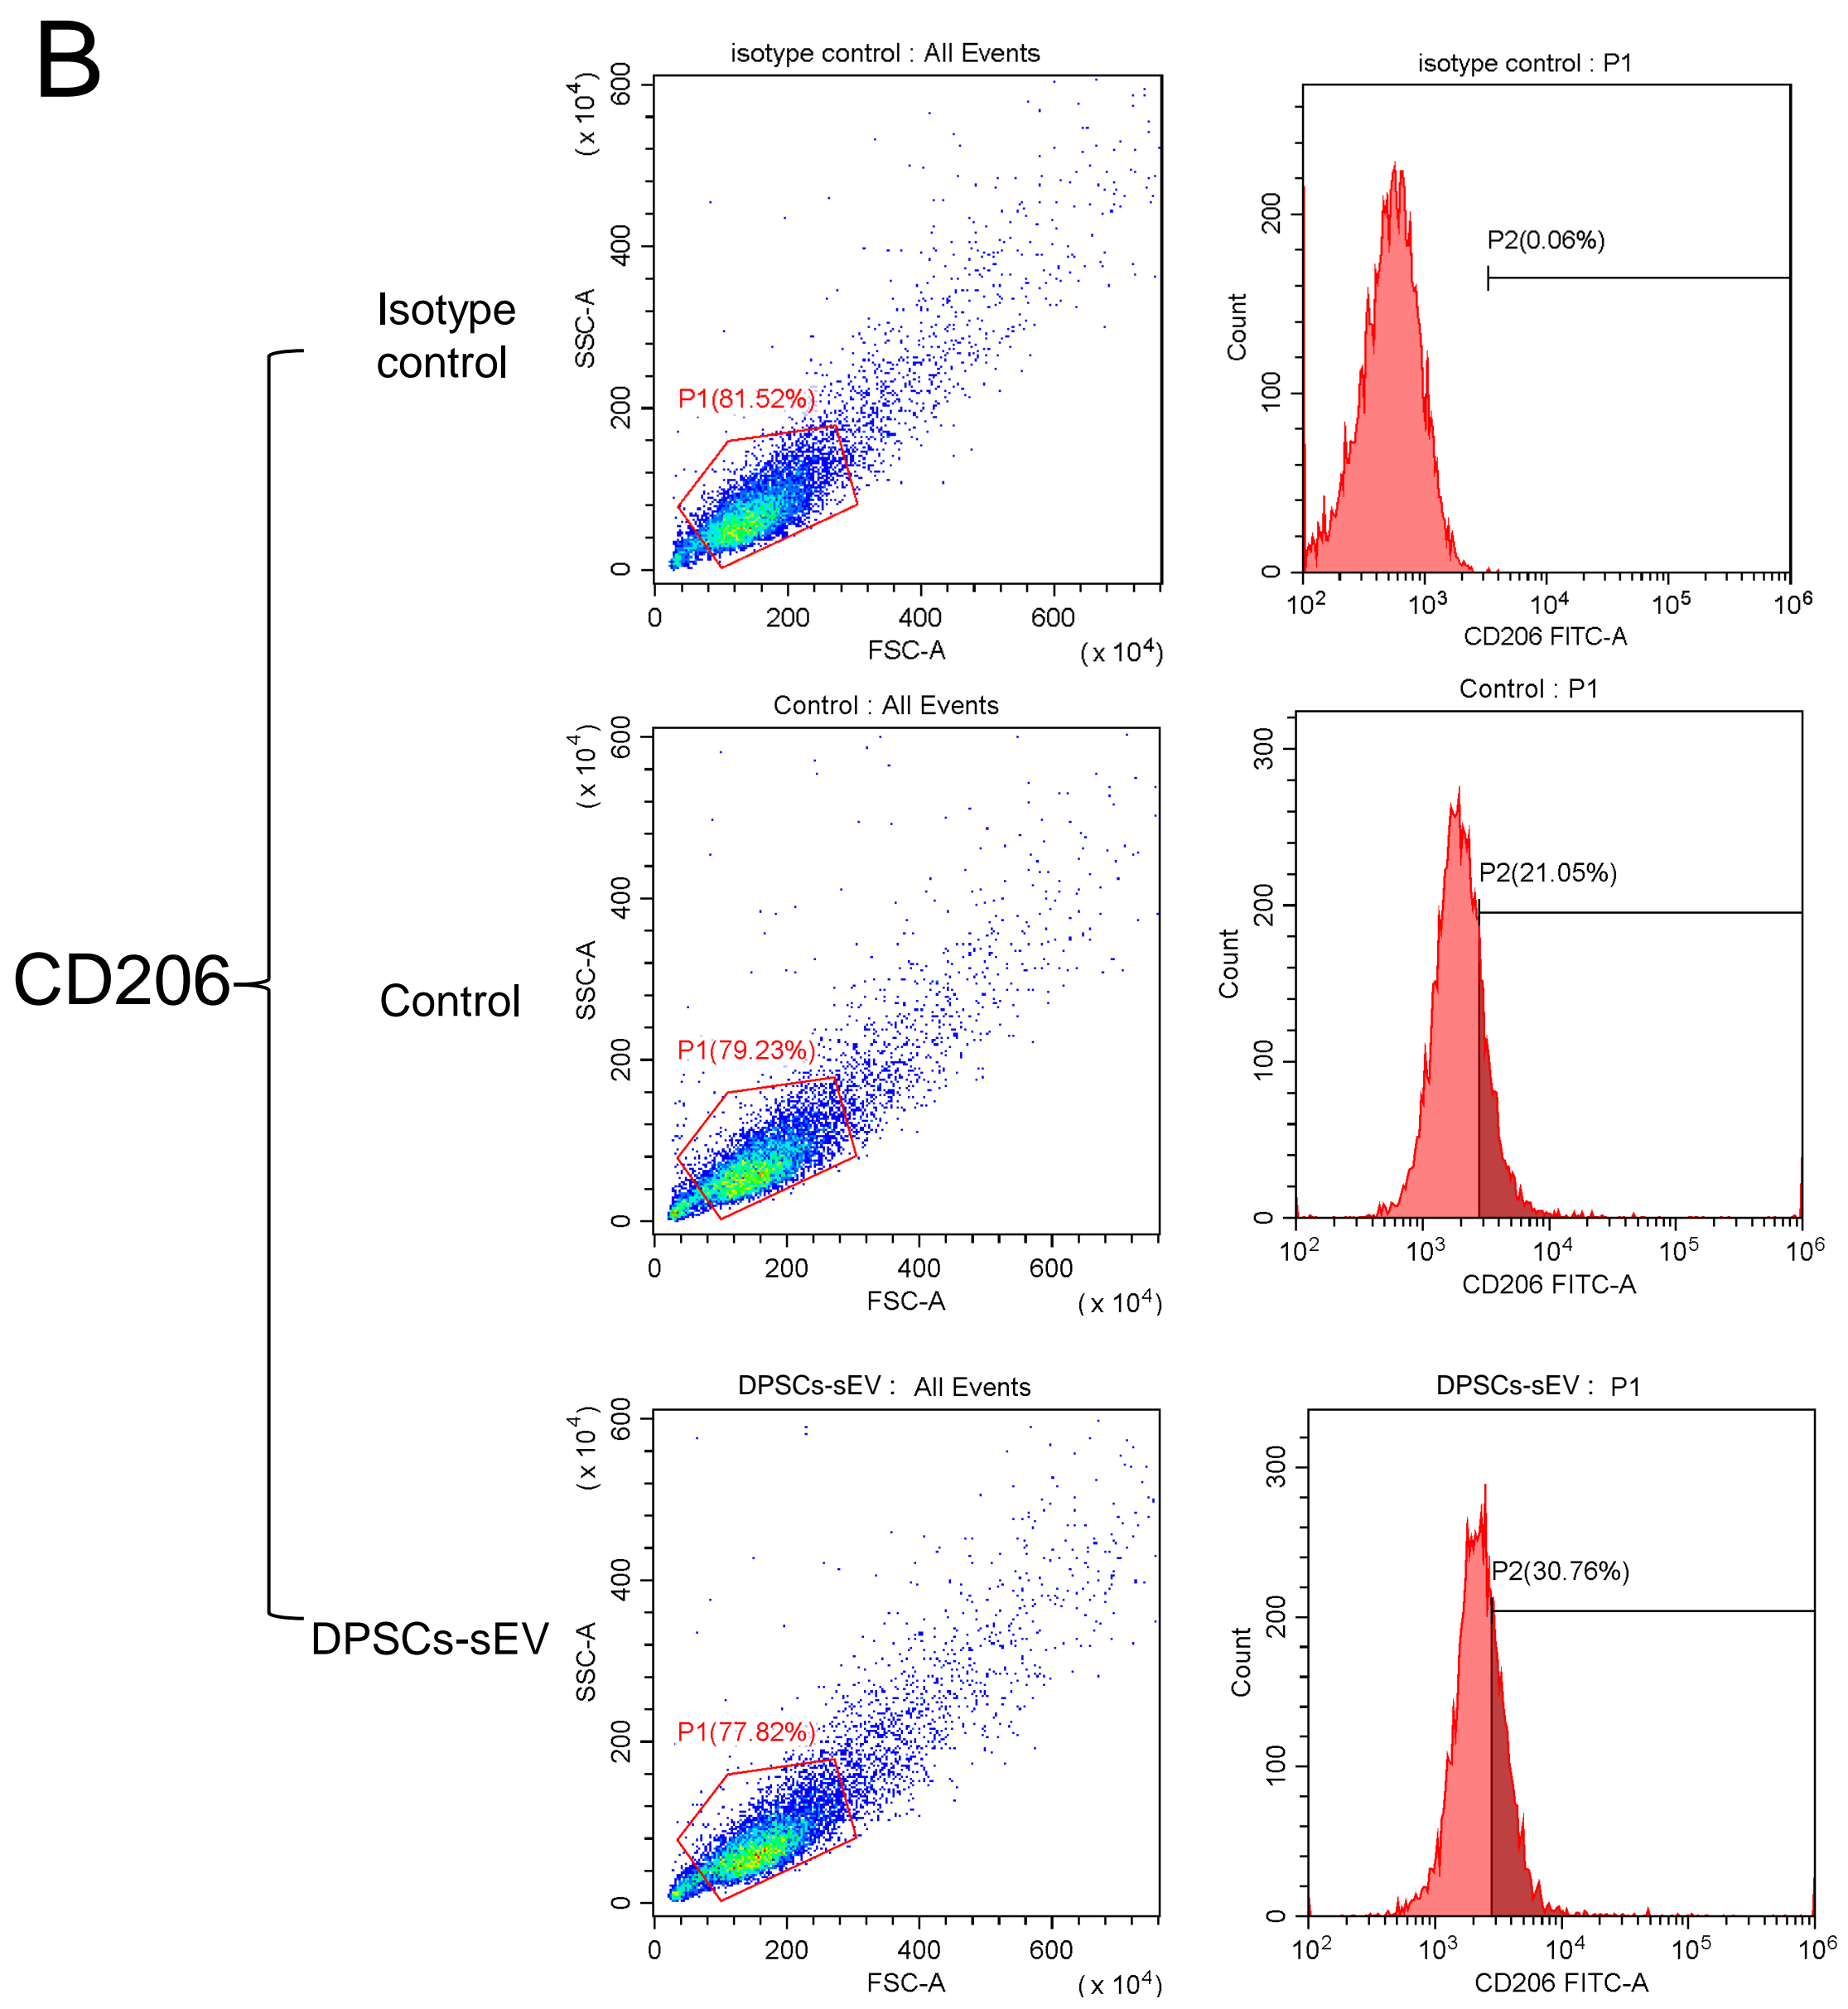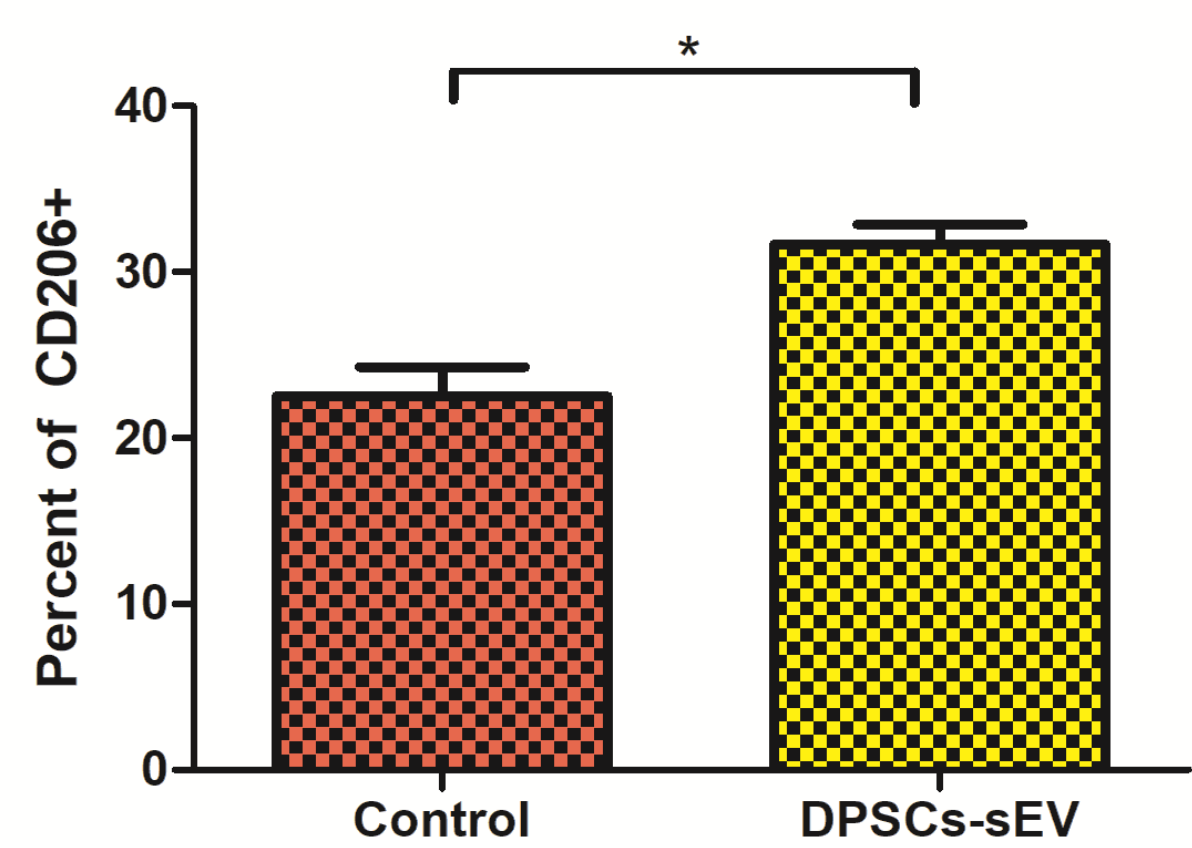

Supplement: 13287_2020_2039_MOESM3_ESM.pdf [file 13287_2020_2039_MOESM3_ESM.pdf]
